# Supplementary material
Source: Springer Nature journal article supplement (https://www.springermedizin.de/resource/supplementary/12936_2011_1819_MOESM2_ESM.pdf/9541840)

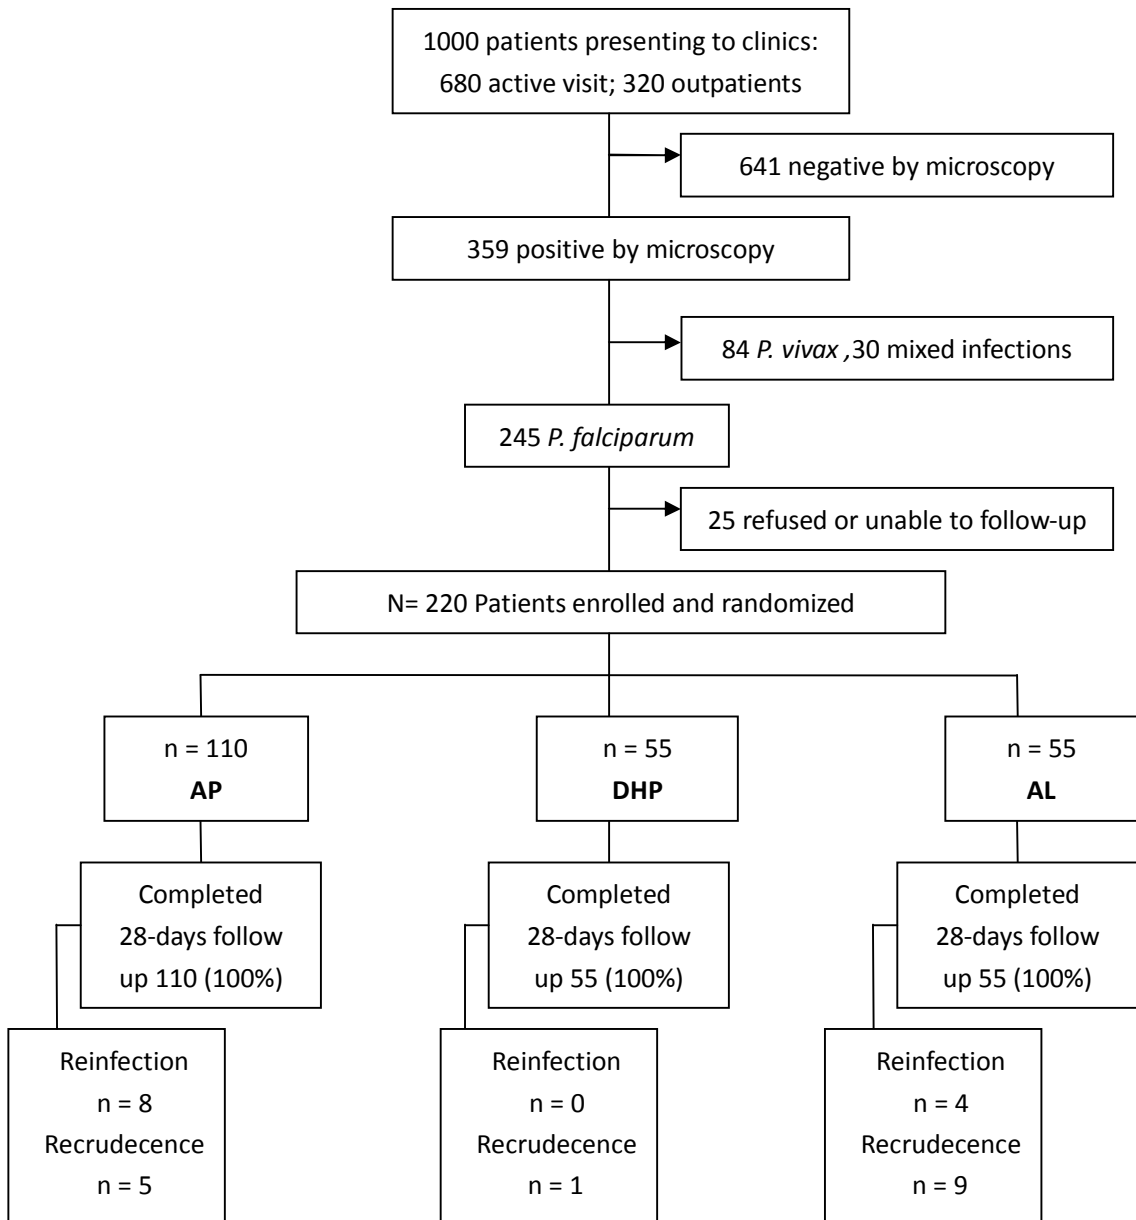

Supplement: MOESM2 [file 9541840]
